# Supplementary figures and images for: Microfluidic loading of verteporfin into extracellular vesicles for neuroblastoma therapy
Source: Royal Society of Chemistry journal article supplement (doi:10.1039/d4lc01103a), 2025-01-01

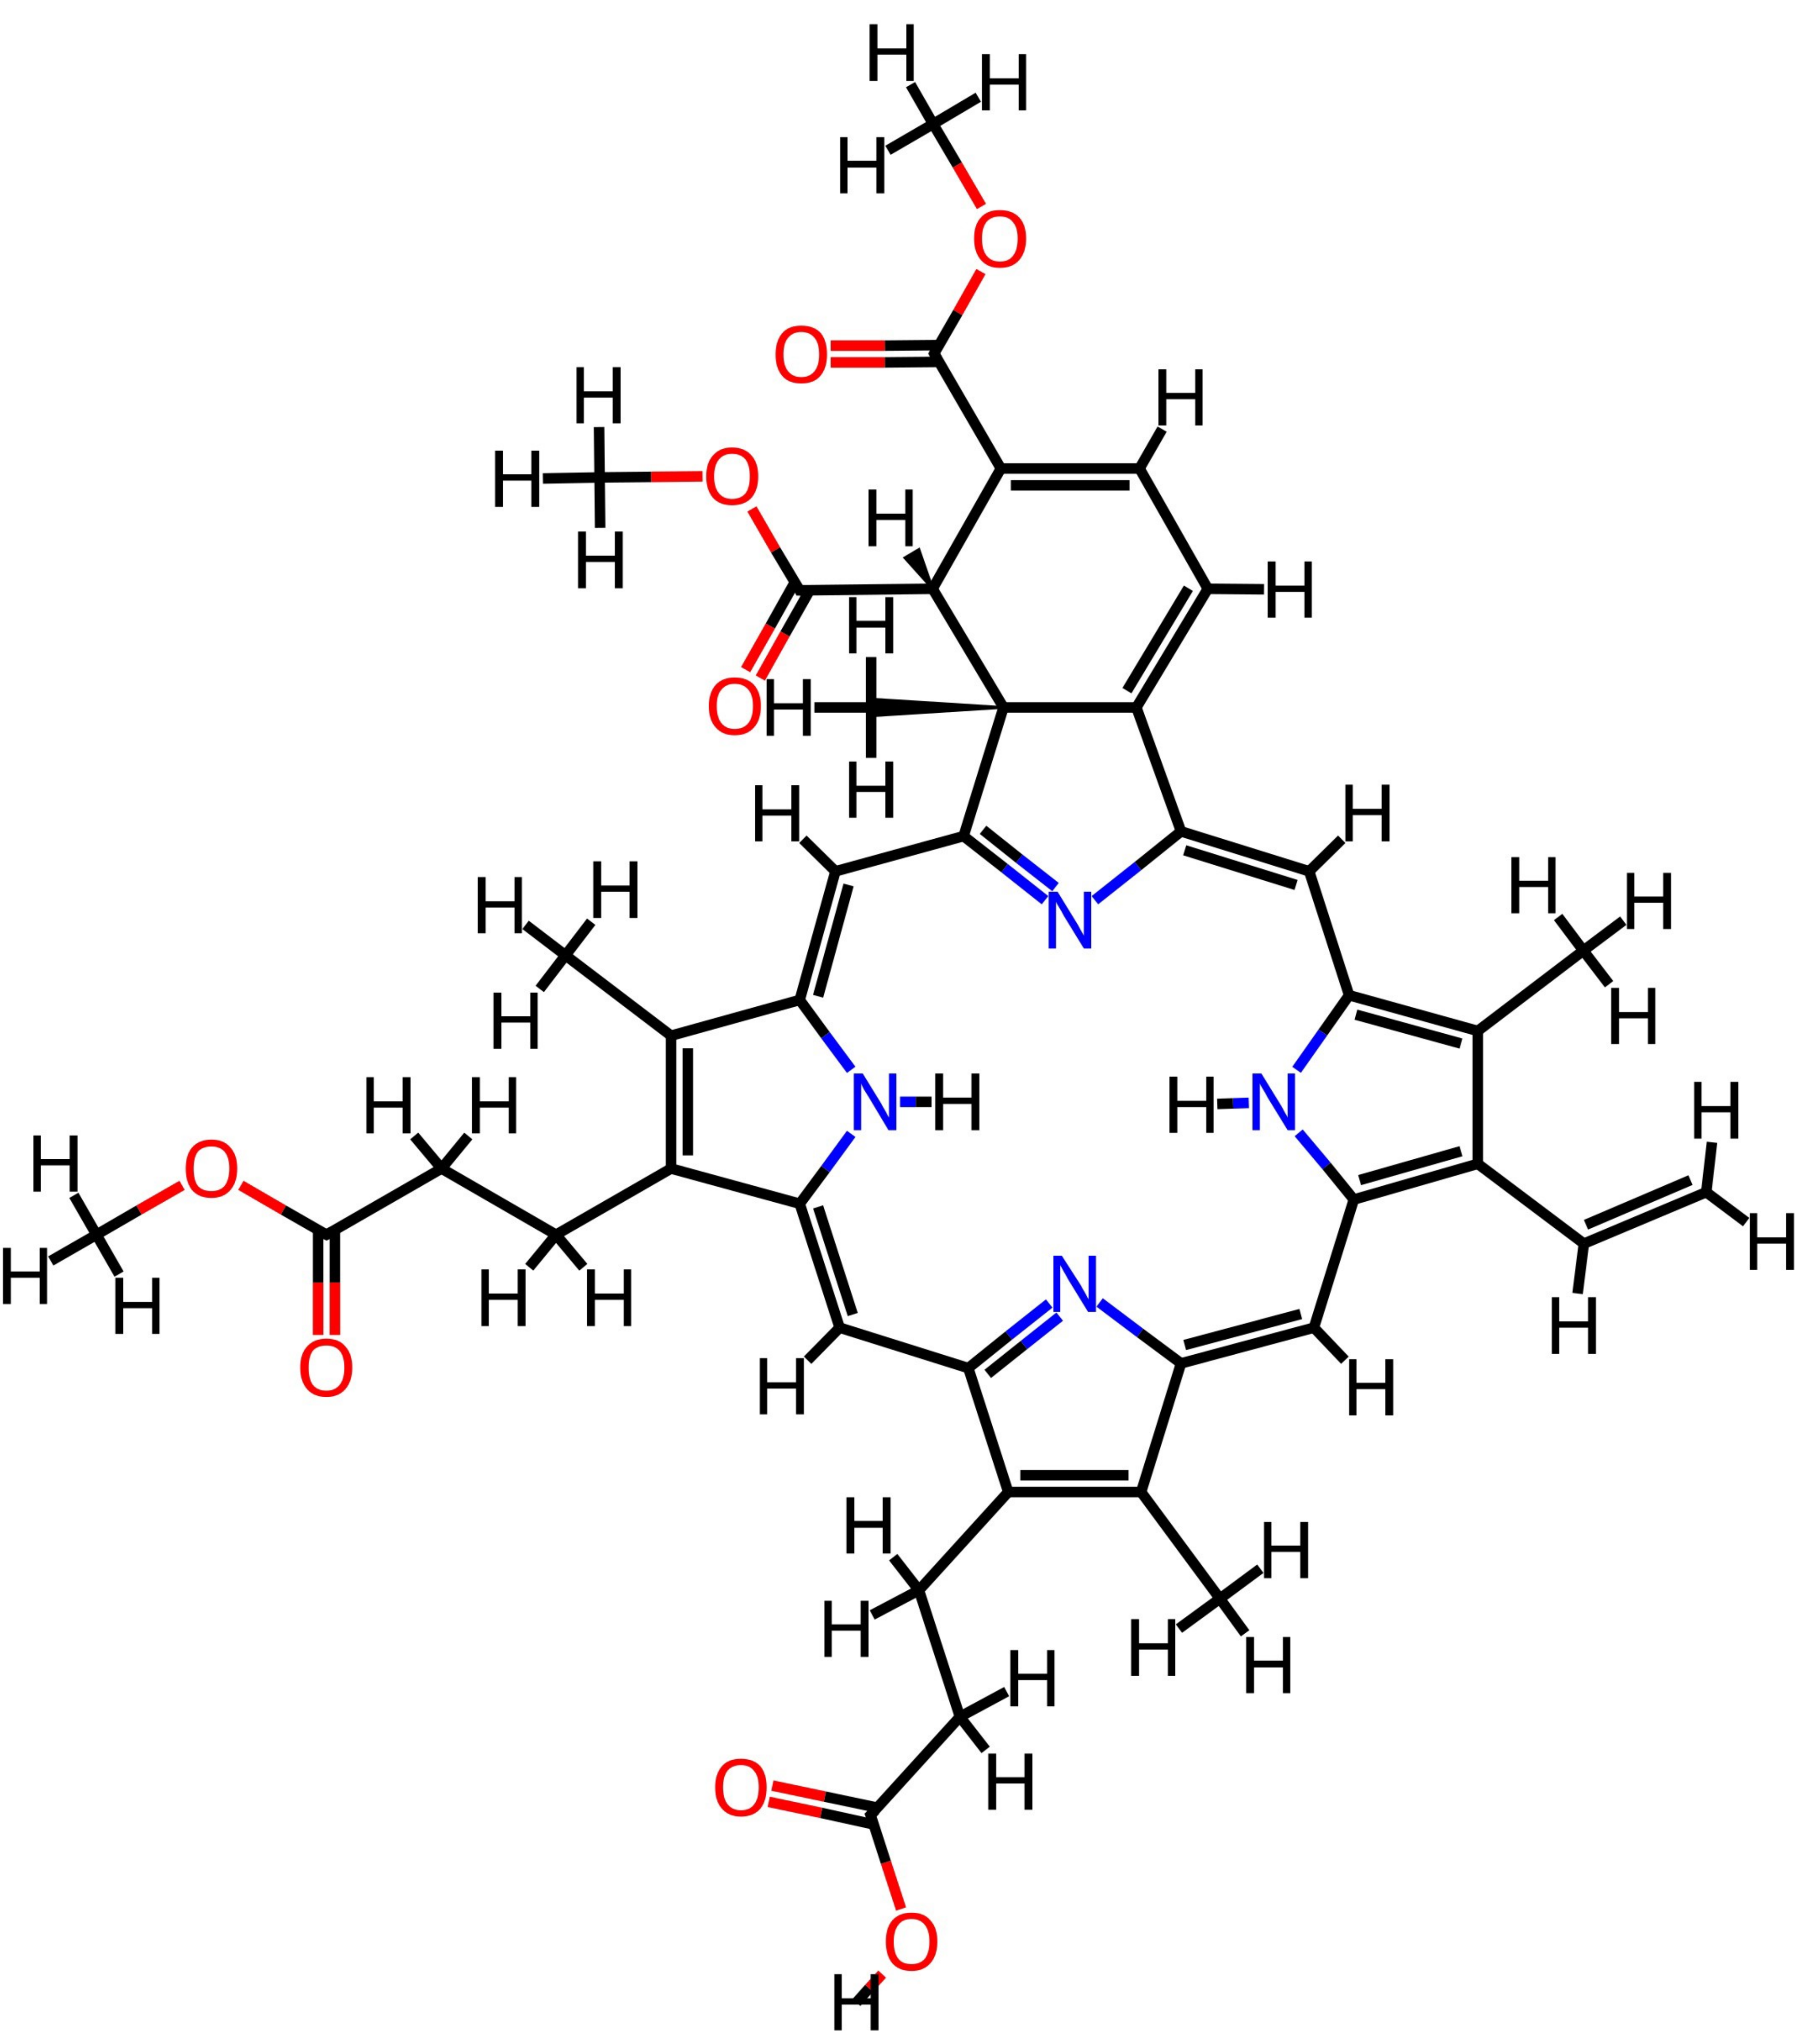

Supplement: d4lc01103a1.pdf [file d4lc01103a1.pdf]

**A**

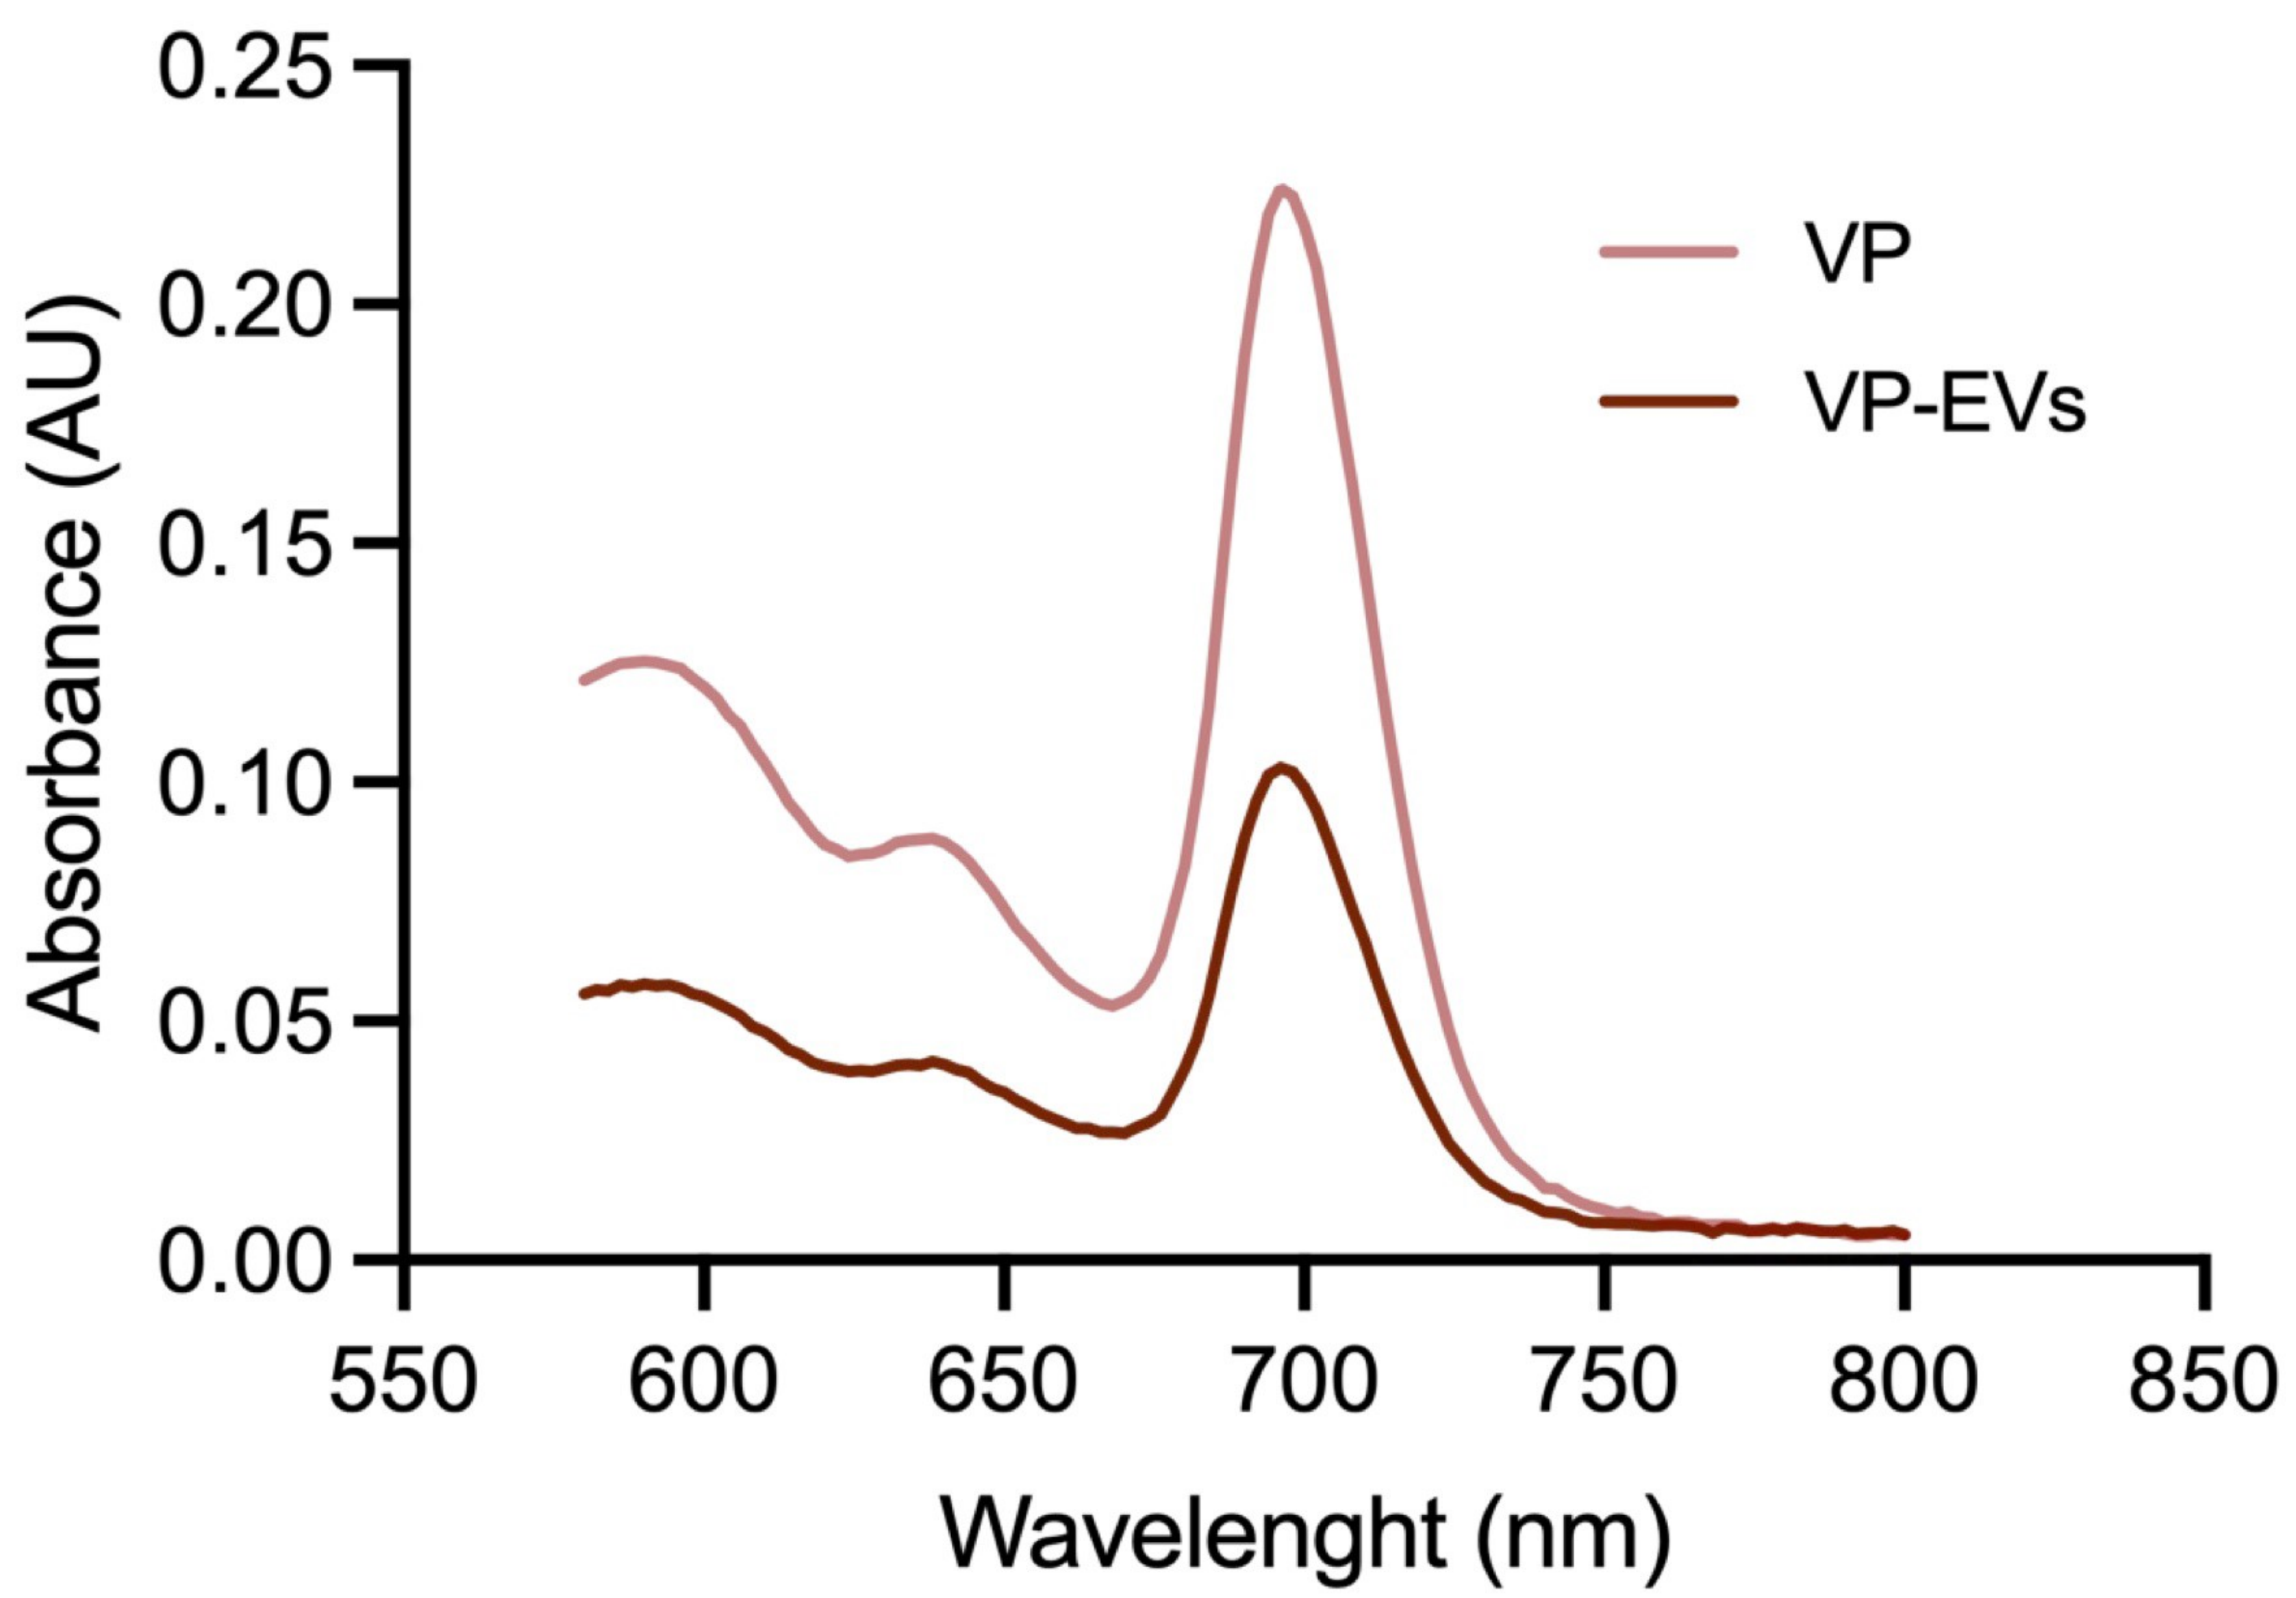

**B**

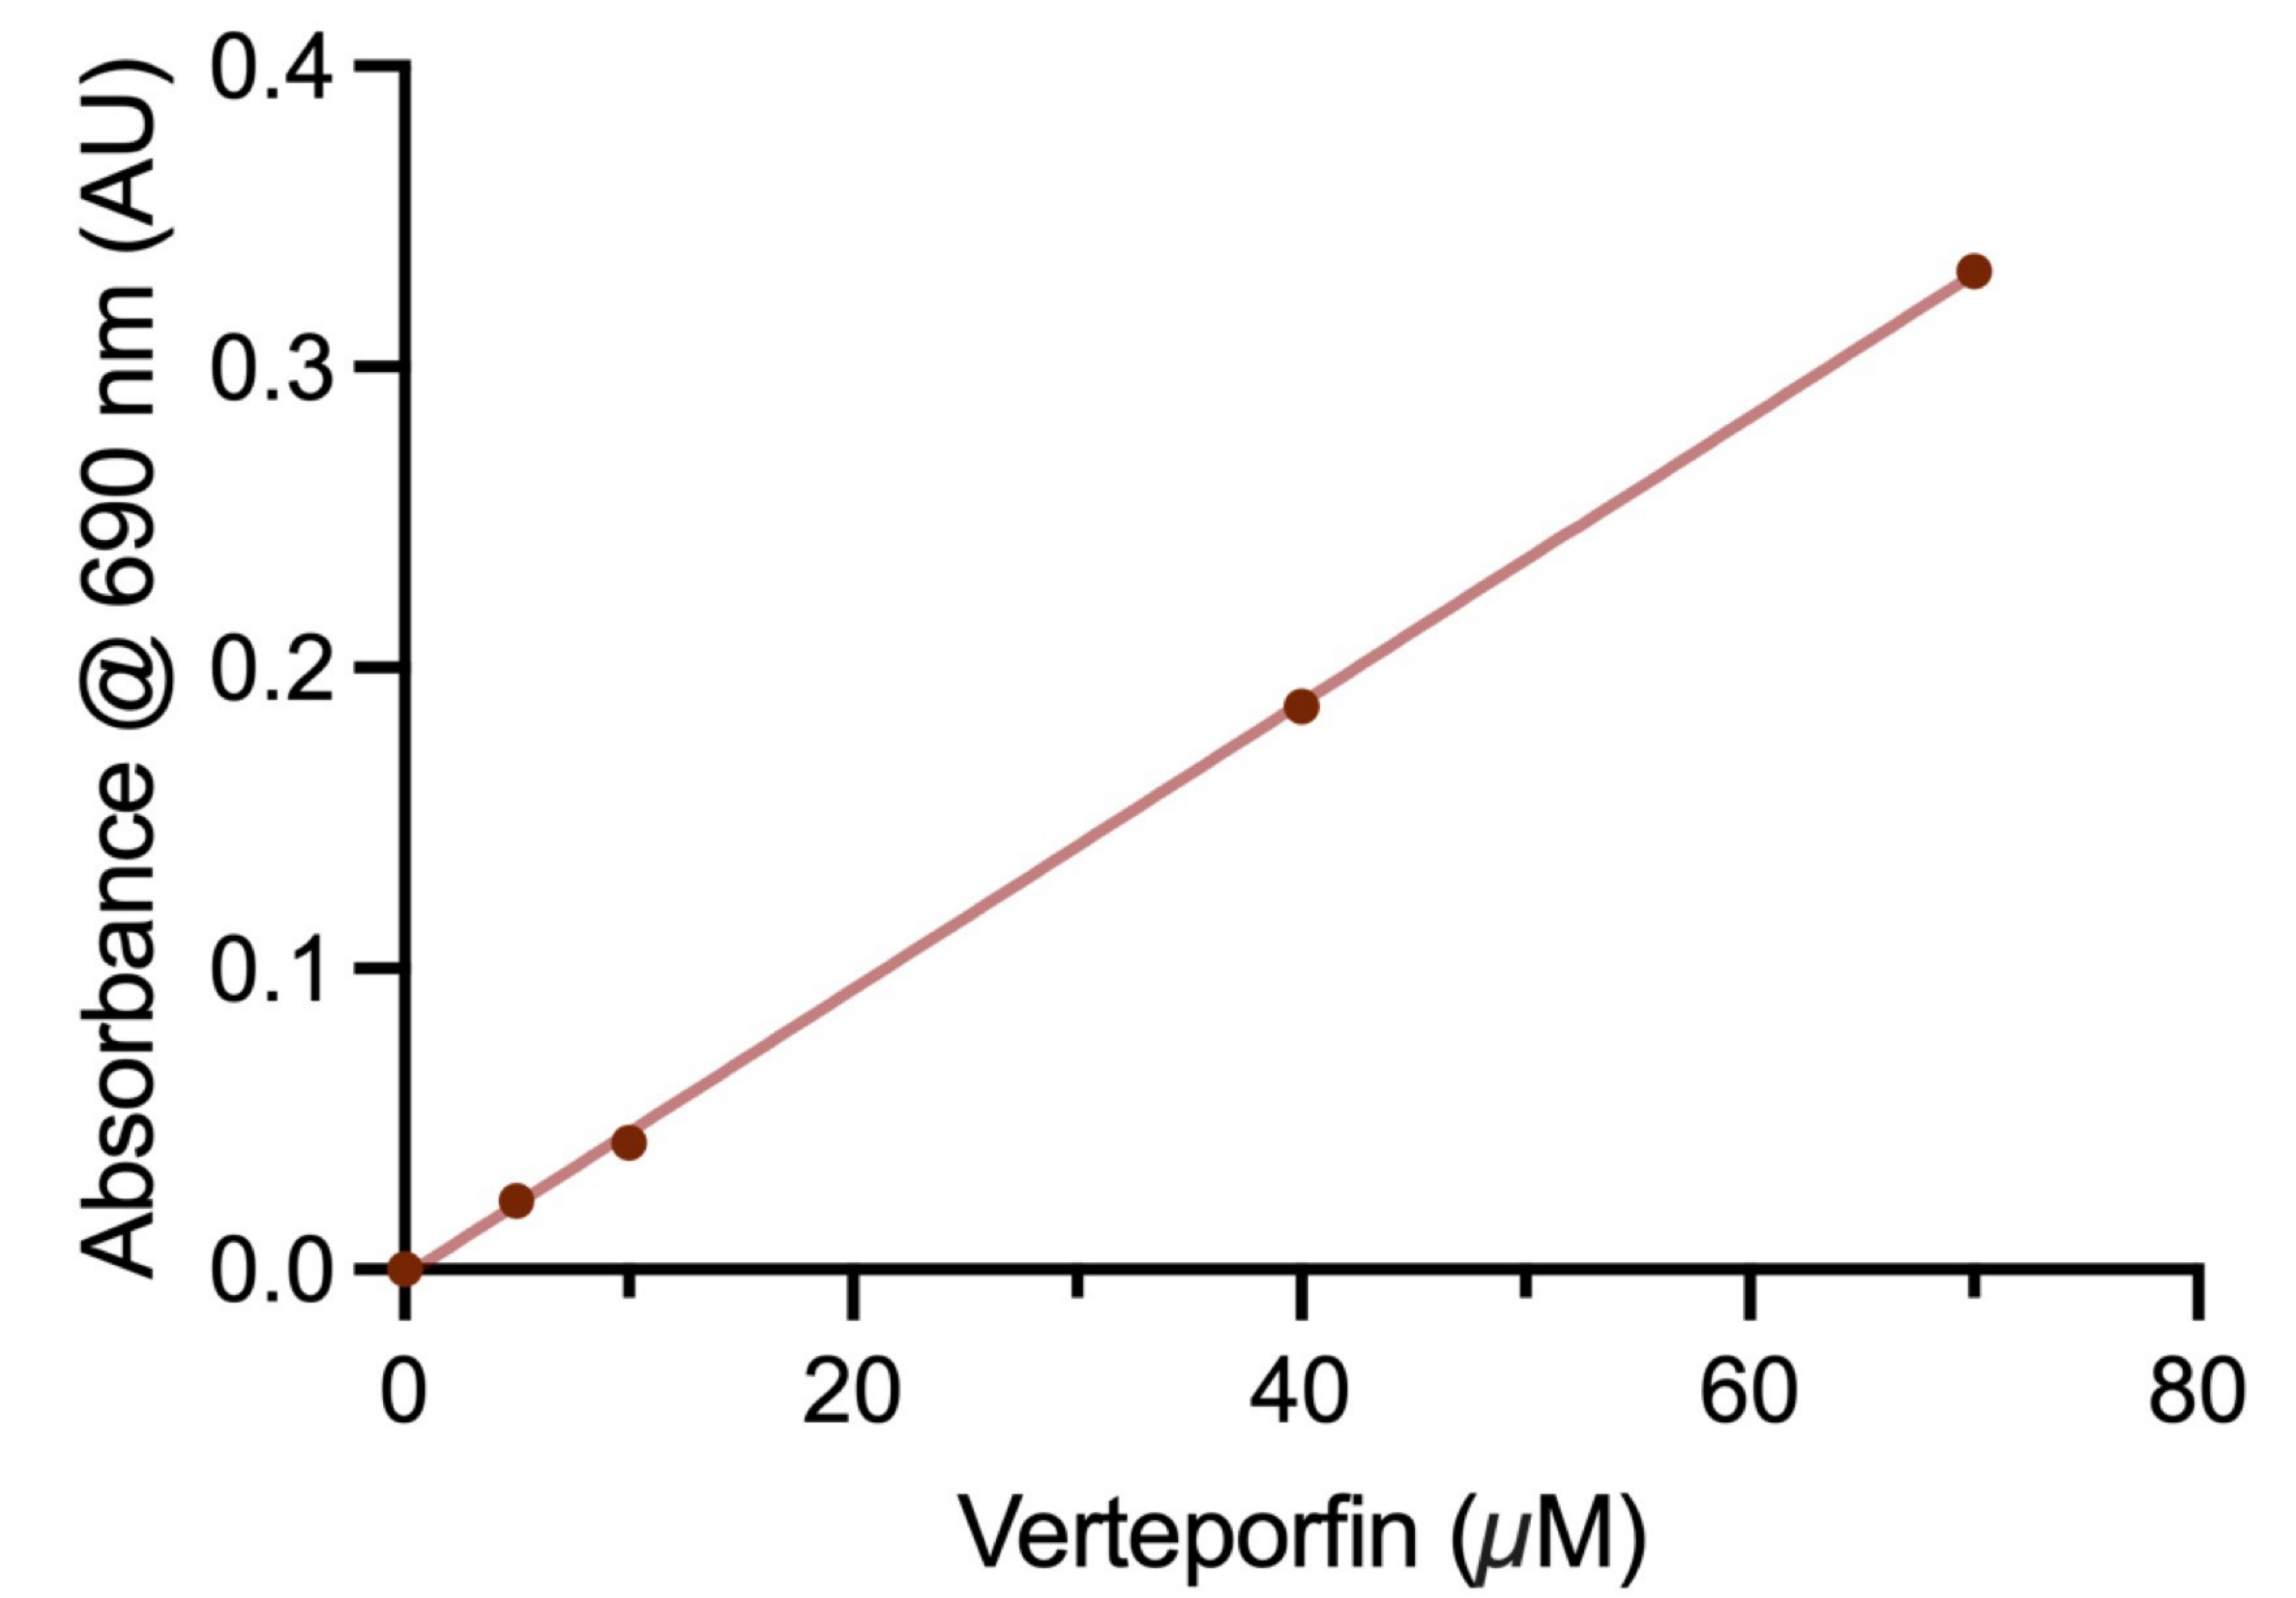

Supplement: d4lc01103a3.pdf [file d4lc01103a3.pdf]

**A**

**a**

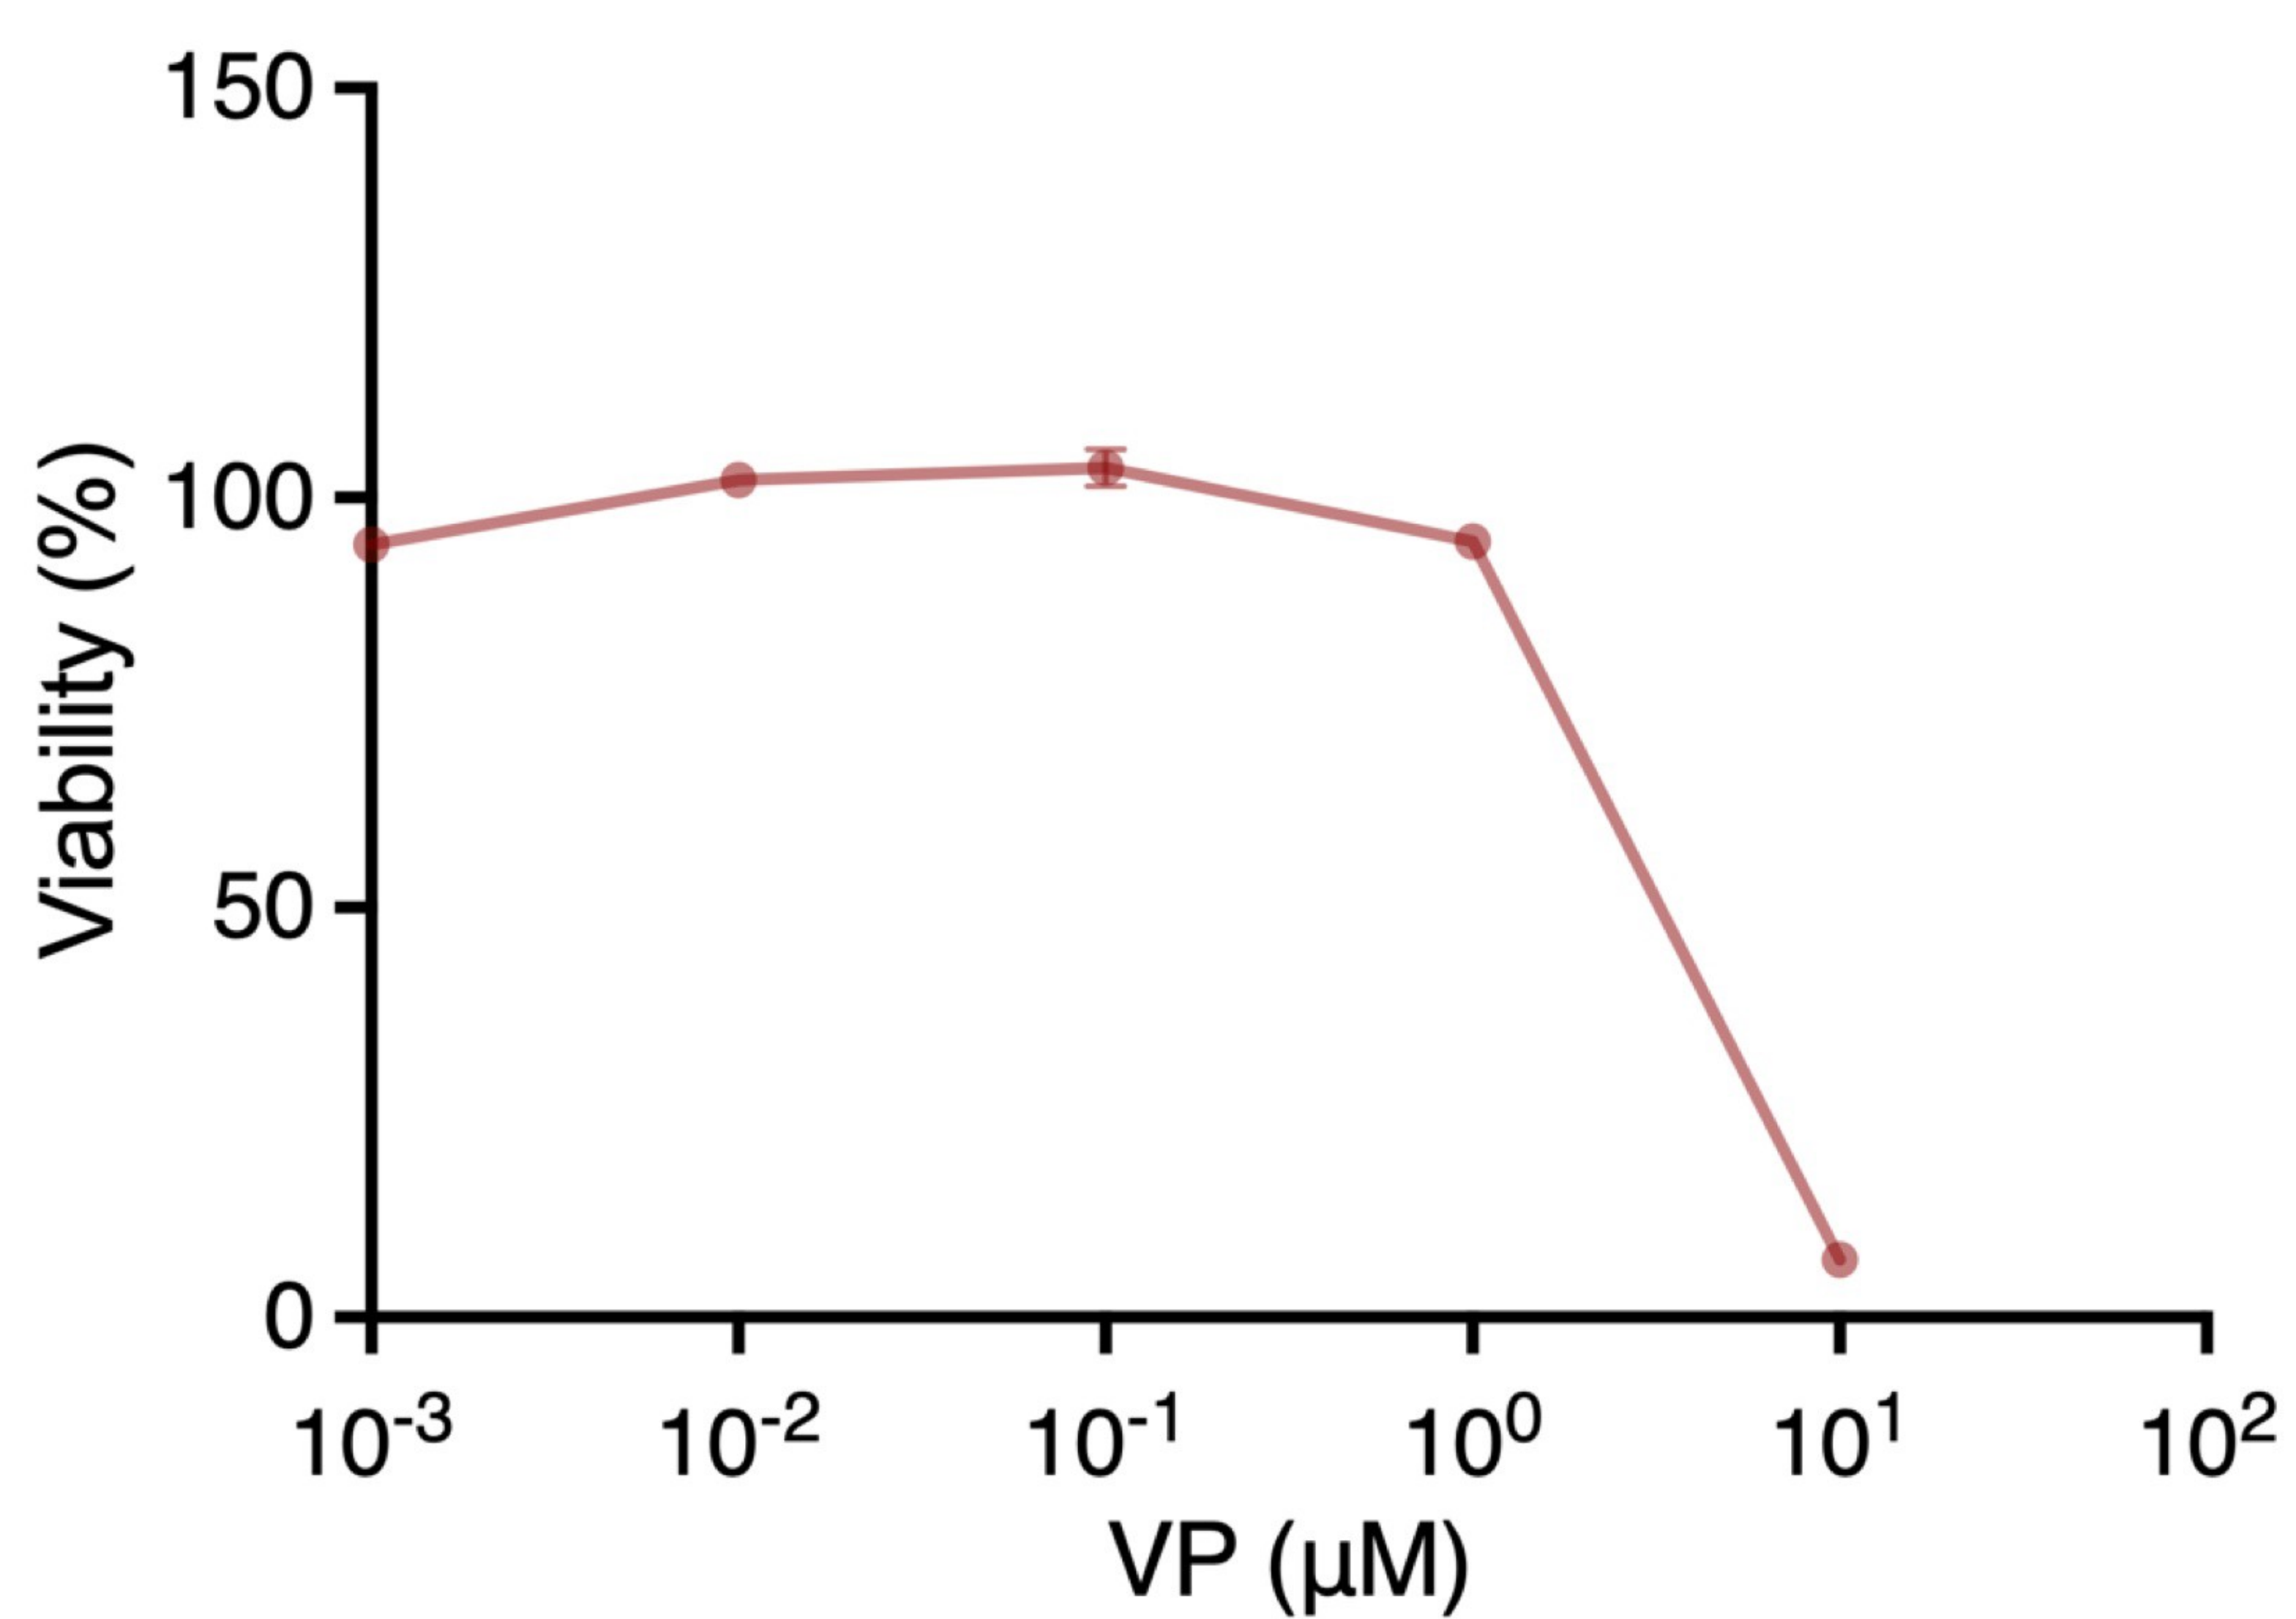

**b**

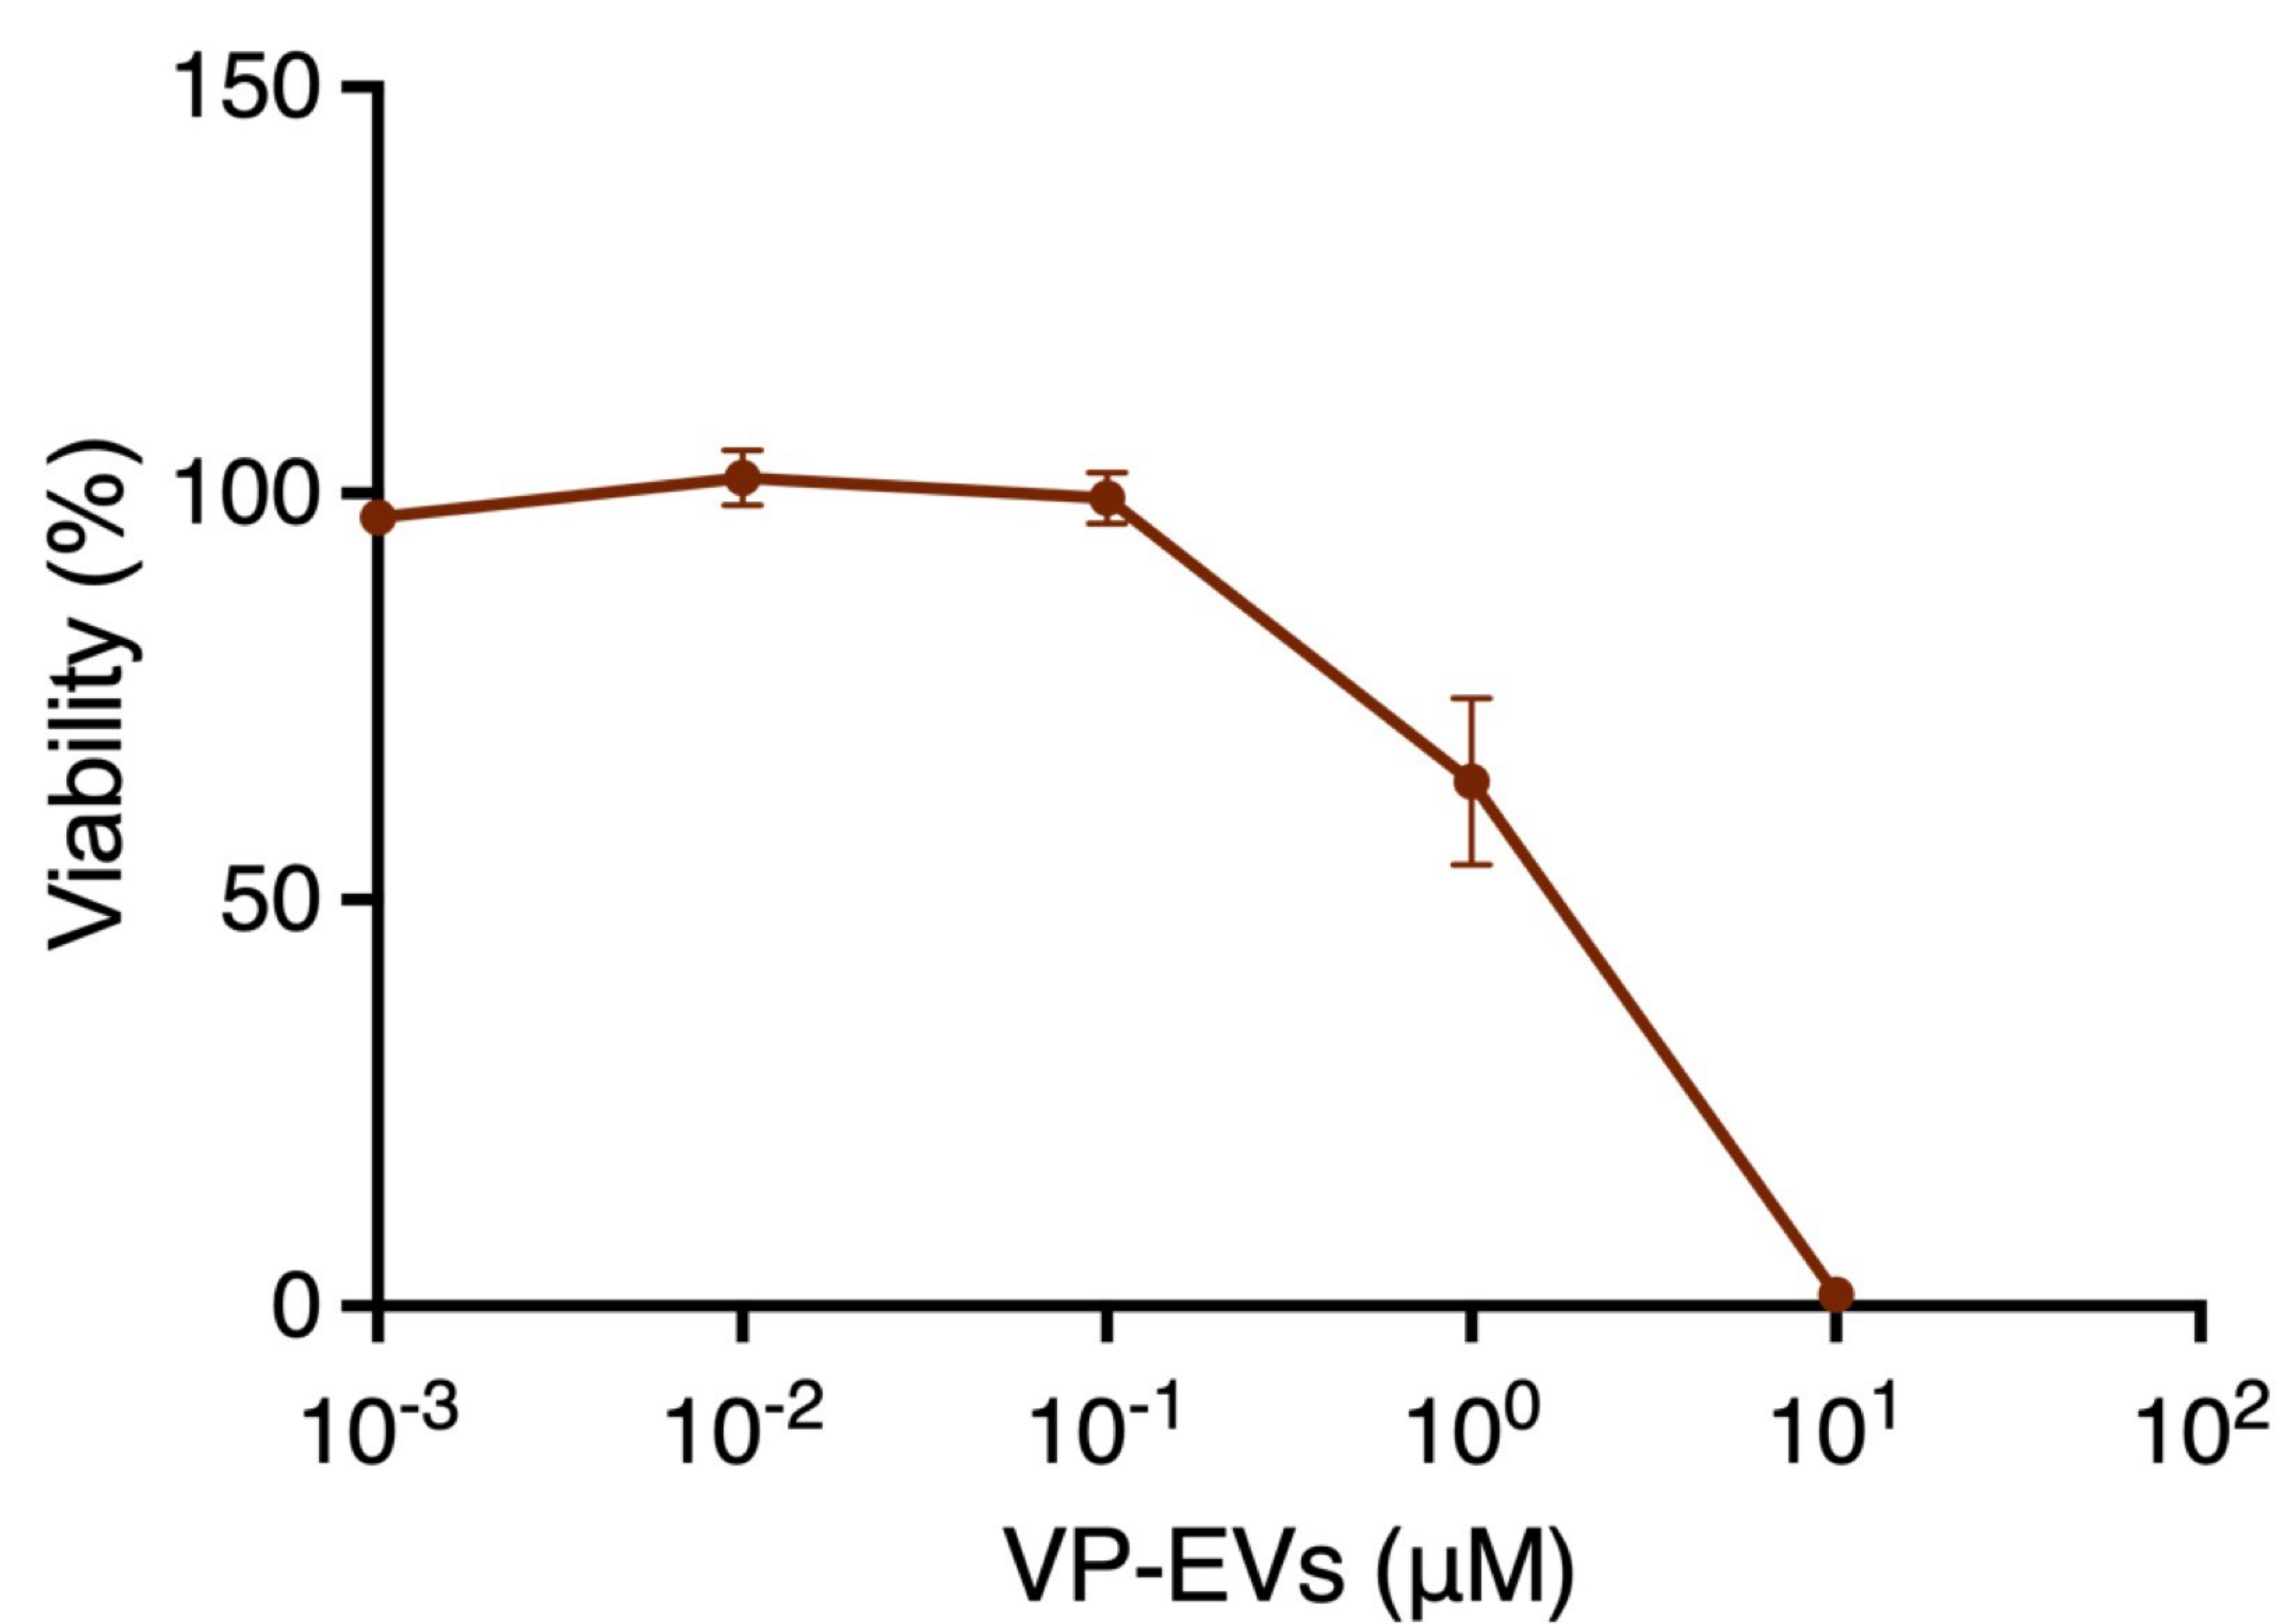

**B**

| DMSO   | EVs    | VP     | VP-EVs |
|--------|--------|--------|--------|
| 0.8388 | 0.633  | 0.5228 | 0.1611 |
| 0.8791 | 0.608  | 0.5105 | 0.1749 |
| 0.7983 | 0.6143 | 0.5139 | 0.1854 |
| 0.8332 | 0.7674 | 0.553  | 0.1924 |
| 0.8979 | 0.6548 | 0.5191 | 0.1422 |
| 0.8873 | 0.6613 | 0.5126 | 0.1673 |

**C**

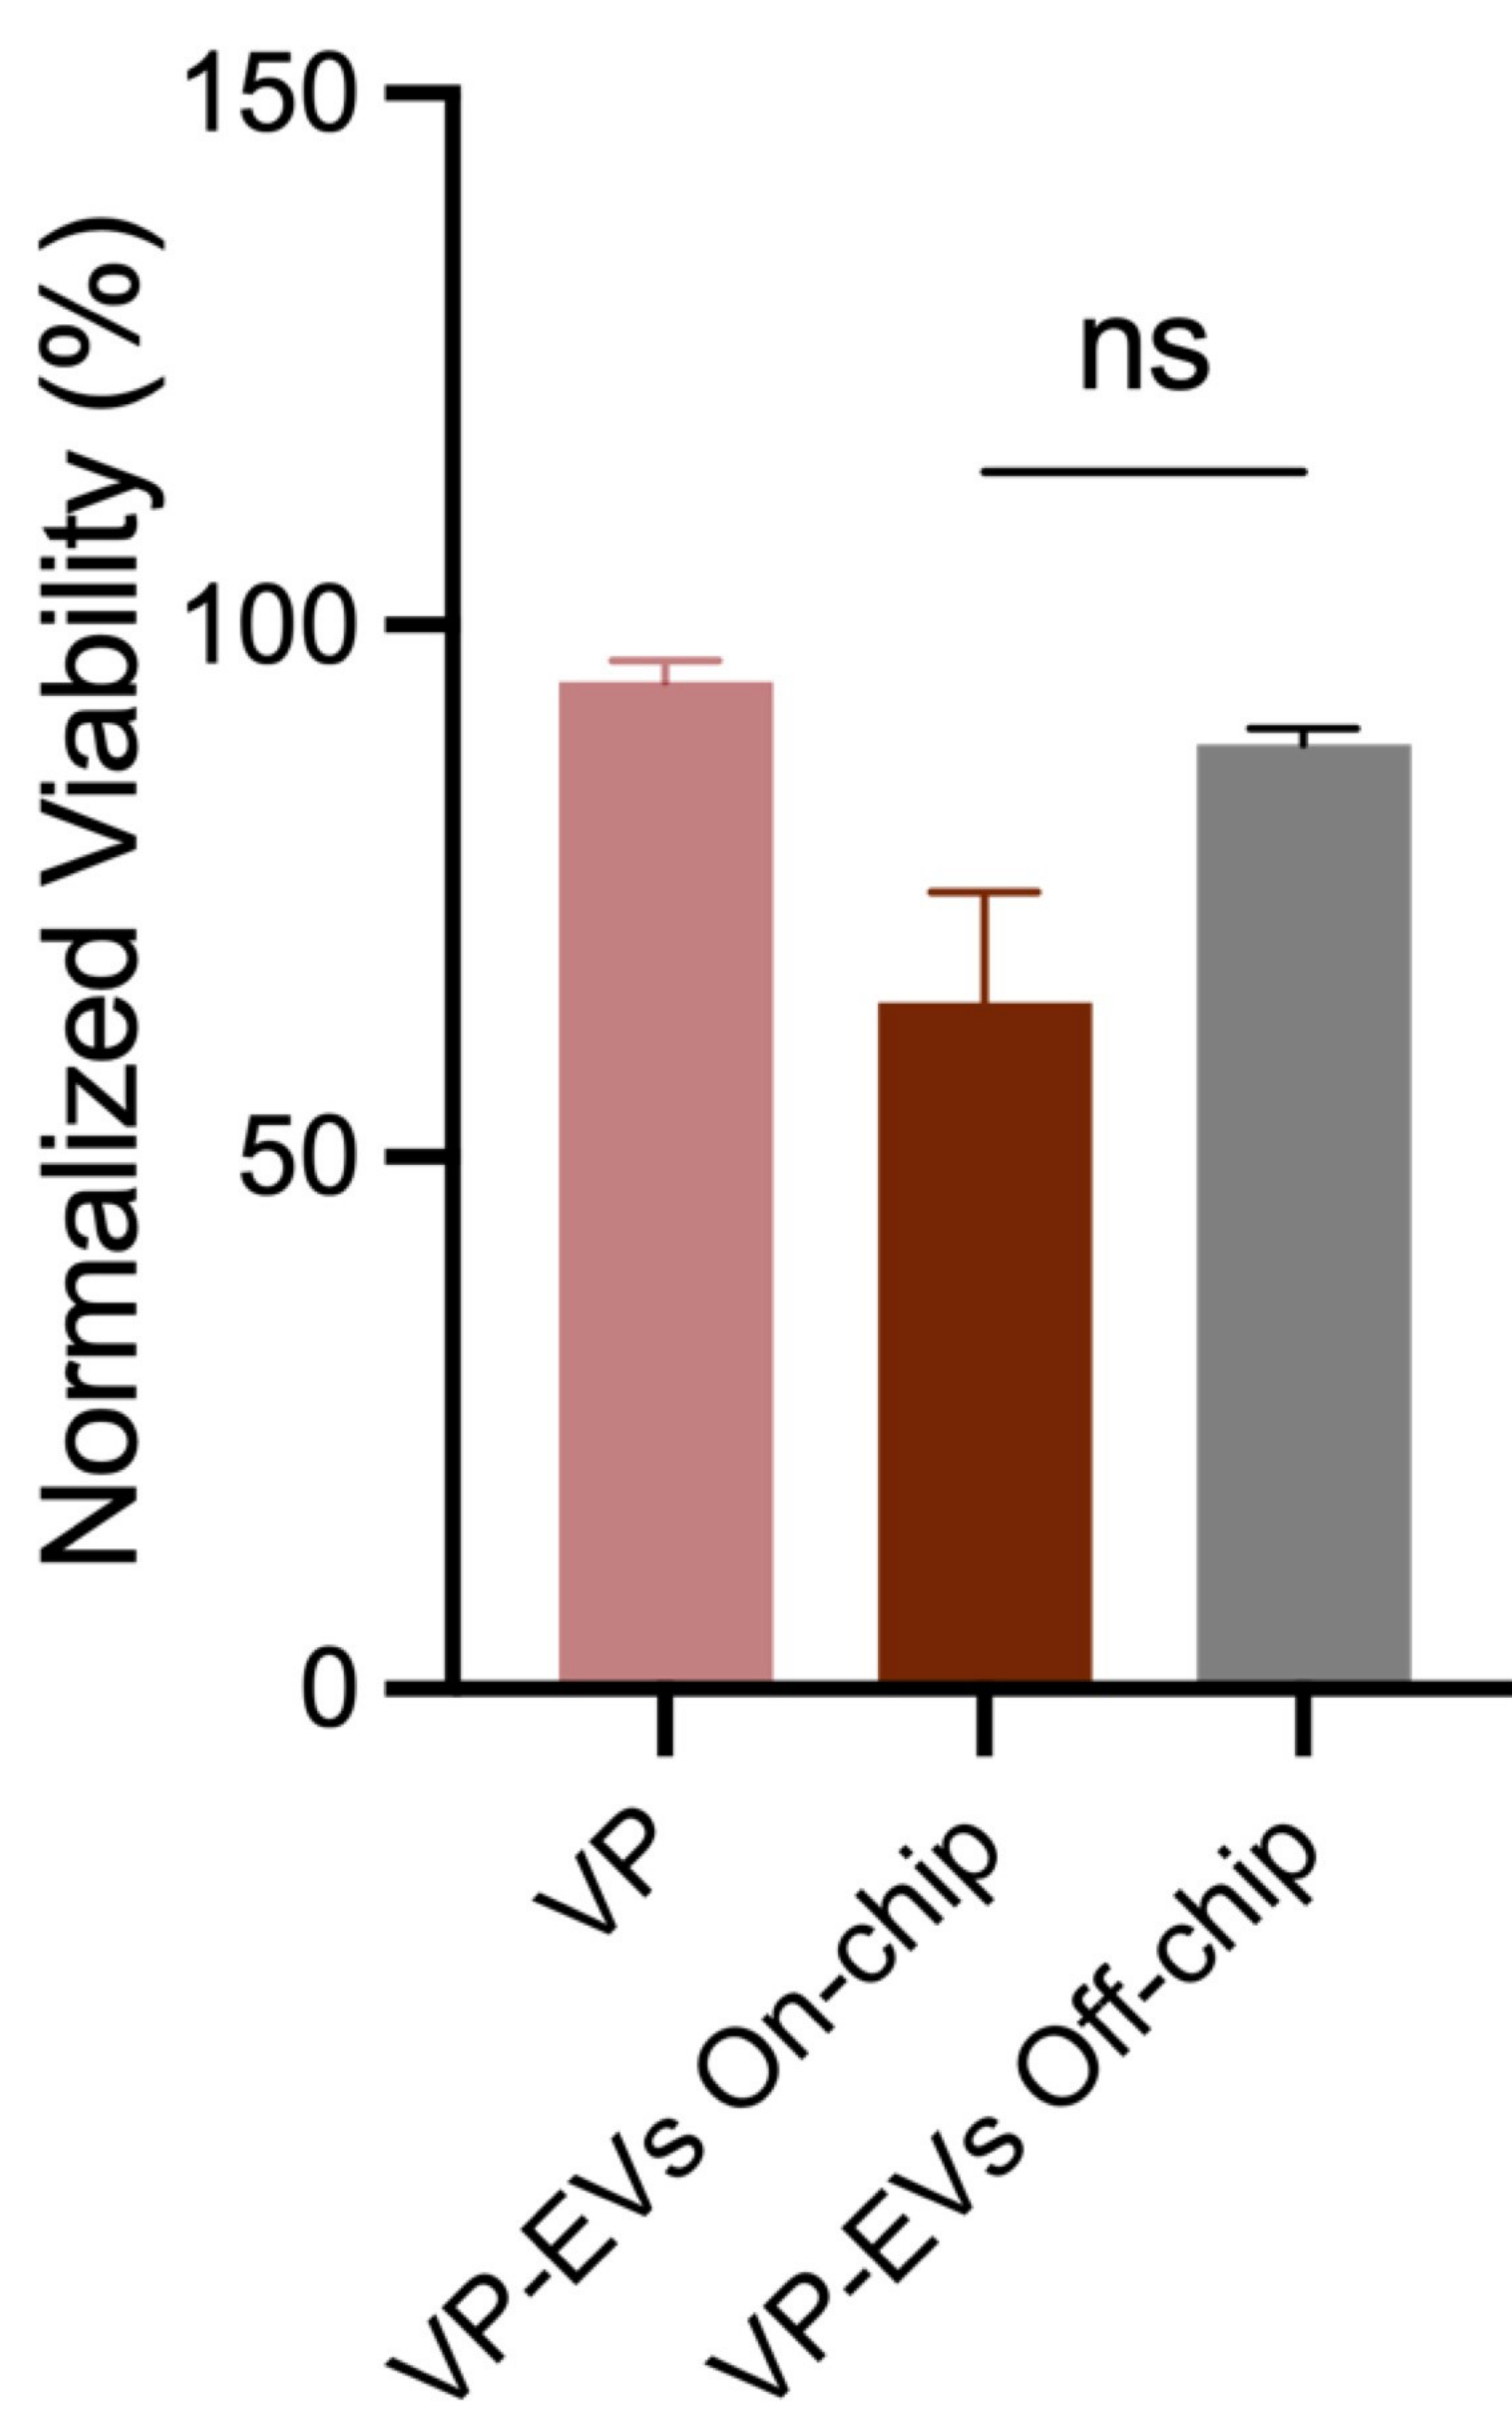

Supplement: d4lc01103a5.pdf [file d4lc01103a5.pdf]
